# Supplementary material
Source: PubMed Central journal article supplement (PMC3626112)
Supplement: NIHMS453841-supplement-e_Figure_2.pdf [file NIHMS453841-supplement-e_Figure_2.pdf]

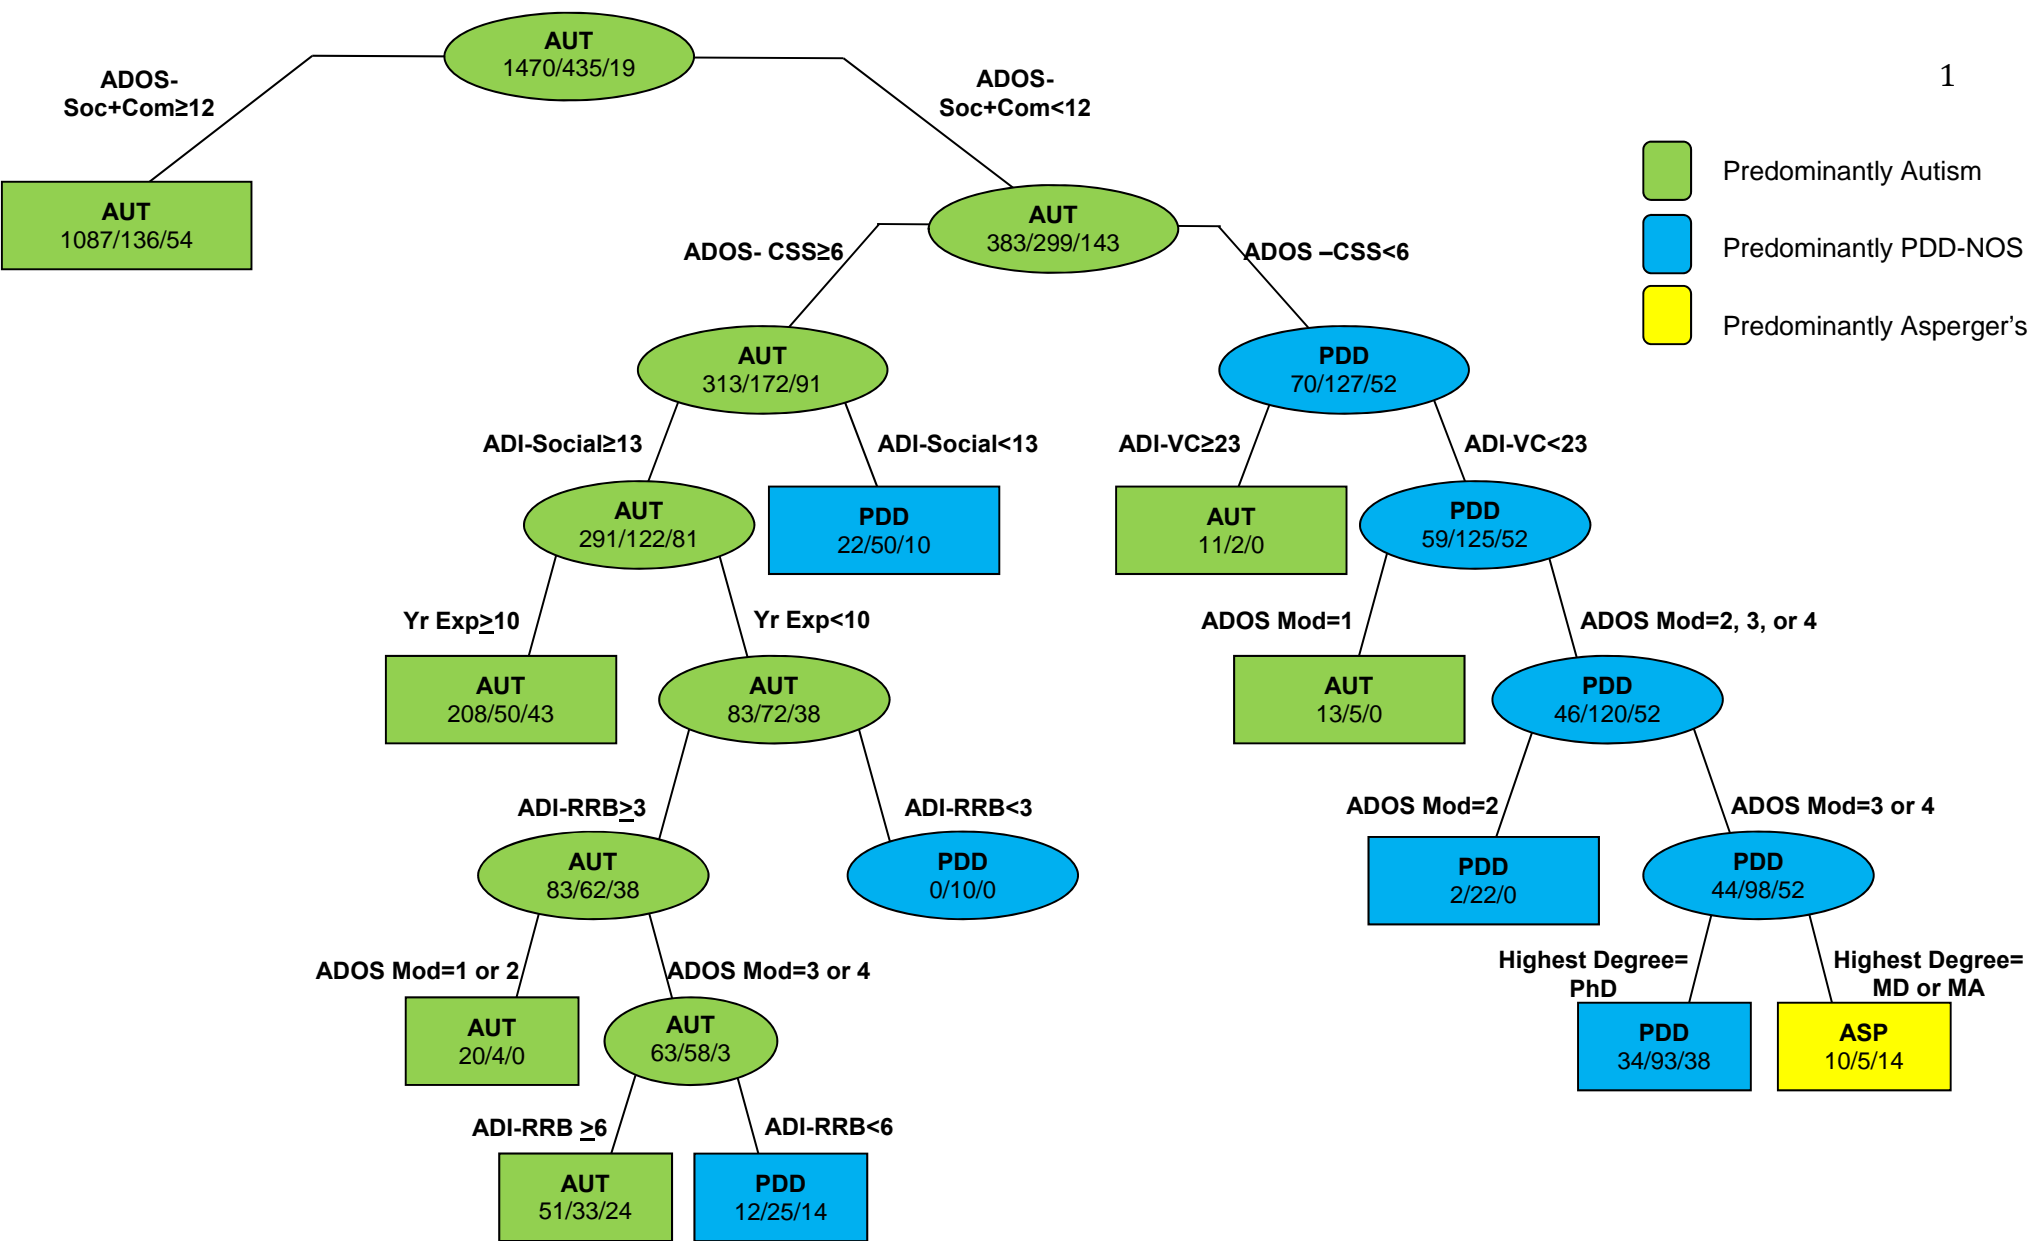

**eFigure 2. CART.1 for diagnoses with only diagnostic scales as predictors.**

Numbers denote Ns for each diagnostic group: AUT/PDD-NOS/ASP. ADOS-Soc+Com=ADOS Social + Communication Domain Total; ADOS-CSS=ADOS Calibrated Severity Score; ADOS Mod=ADOS Module; ADI-Social=ADI-R Social Total; ADI-VC=ADI-R Verbal Communication Total; ADI-RRB=ADI-R Restricted and Repetitive Behaviors Total; Yr Exp=Senior Diagnostician's Number of Years of Experience; Highest Degree=Senior Diagnostician's Type of Degree.
