# Supplementary material
Source: PubMed Central journal article supplement (PMC3626112)
Supplement: NIHMS453841-supplement-e_Figure_3.pdf [file NIHMS453841-supplement-e_Figure_3.pdf]

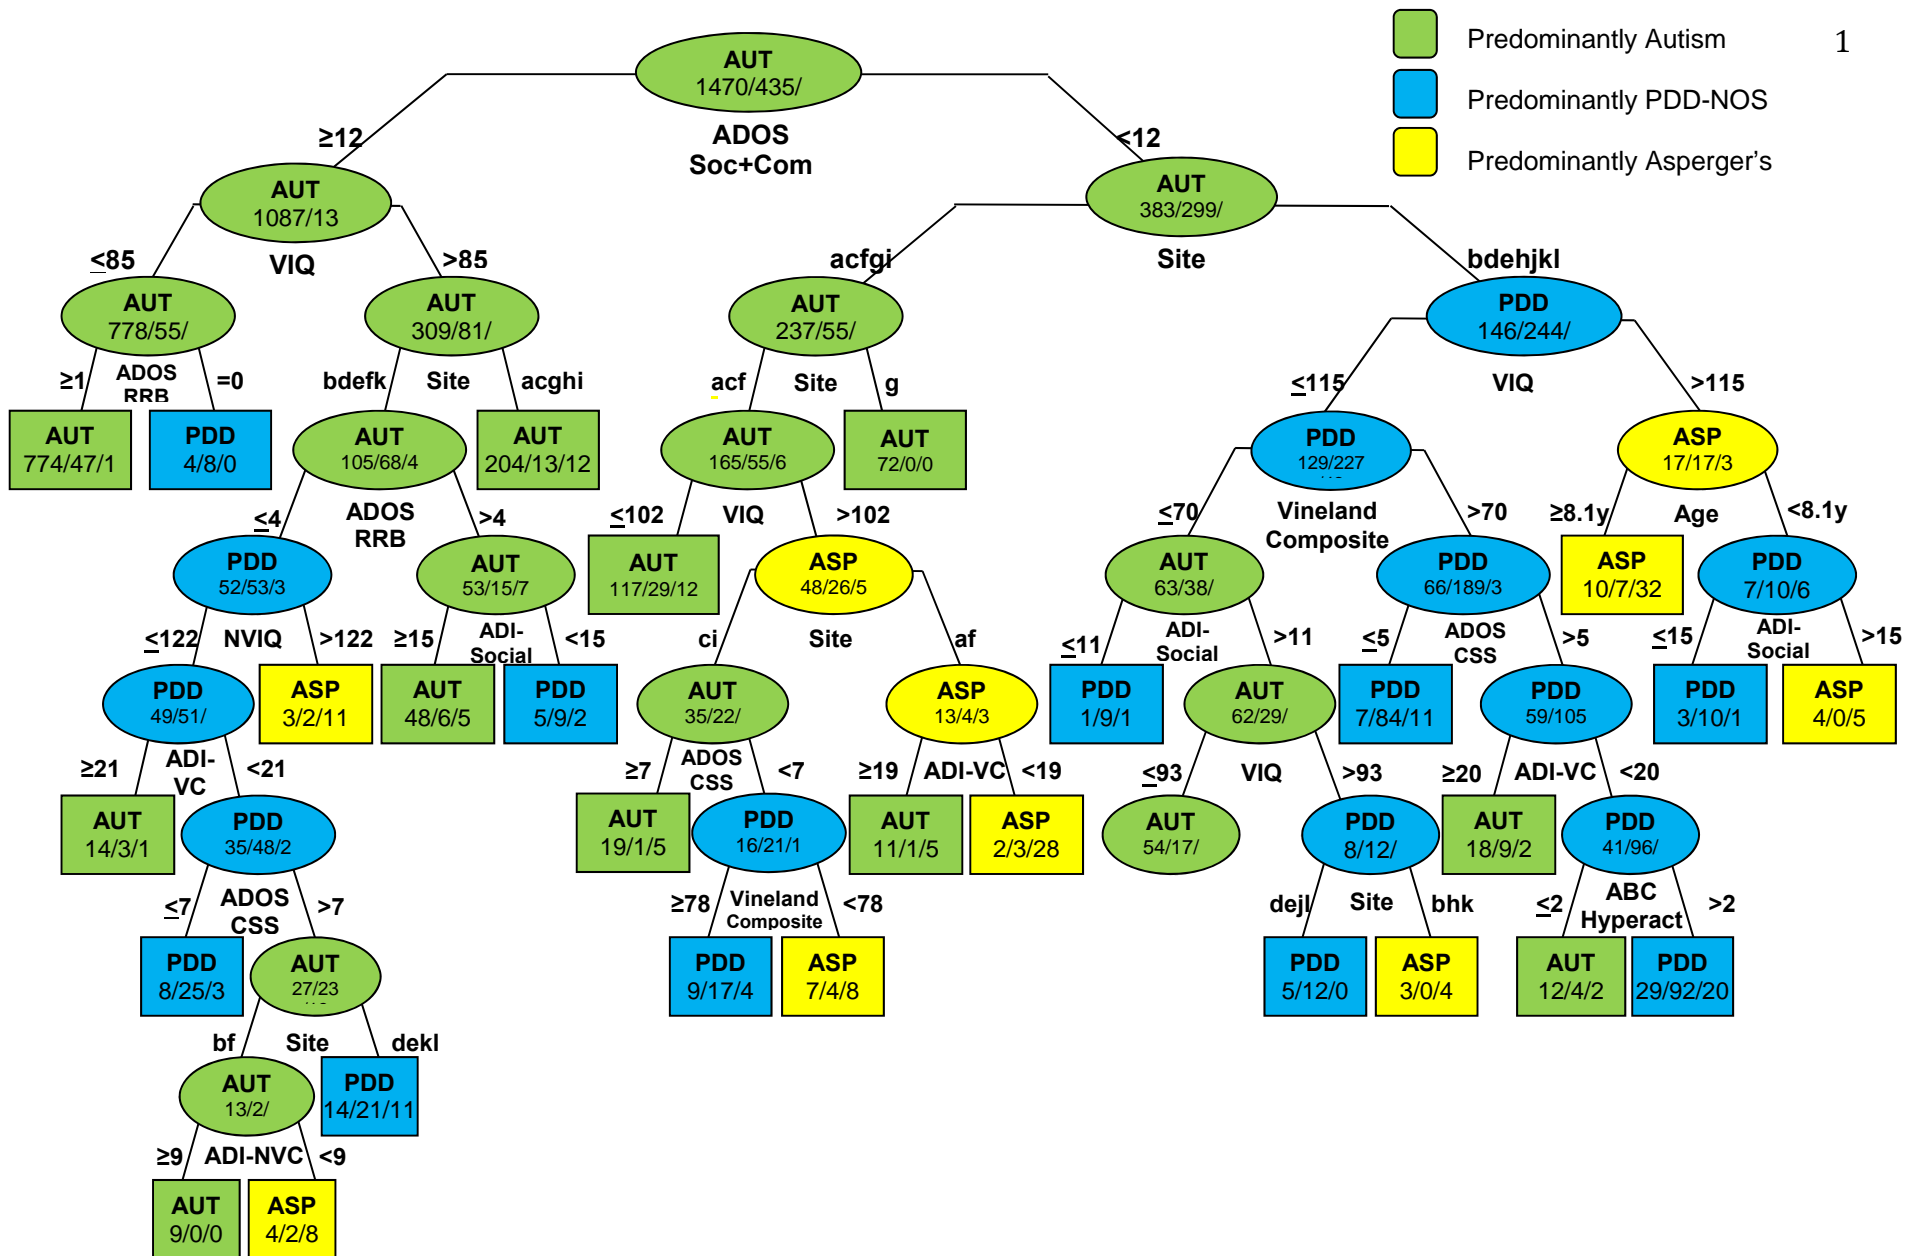

**Figure 3. CART.3 for diagnosis with diagnostic scales, site and demographic and behavior characteristics as predictors.**

Numbers denote Ns for each diagnostic group: AUT/PDD-NOS/ASP. ADOS-Soc+Com=ADOS Social + Communication Domain Total; ADOS-CSS=ADOS Calibrated Severity Score; ADOS Mod=ADOS Module; ADI-Social=ADI-R Social Total; ADI-VC=ADI-R Verbal Communication Total; ADI-NVC=ADI-R Nonverbal Communication Total; ADI-RRB=ADI-R Restricted and Repetitive Behaviors Total; VIQ=Verbal IQ; Age=Chronological Age in Years; Vineland Composite=Vineland-II Adaptive Behavior Composite; ABC Hyperact=Aberrant Behavior Checklist-Hyperactivity Total
